# Supplementary material
Source: Springer Nature journal article supplement (https://www.springermedizin.de/resource/supplementary/12884_2012_730_MOESM2_ESM.pdf/9458564)
Supplement: MOESM2 [file 9458564]

## Vaginal or cesarean delivery preferences (English translation)

Answer the first question then select the number (from 1 to 5), that best describes how you feel. Number 1 means that you strongly disagree with the statement, Number 5 means that you strongly agree with the statement.

### 1. If you were to have a baby, how would you prefer to deliver?

- By vaginal delivery
- By caesarean section

### 2. Why would you prefer caesarean section?

- Because I am afraid of pain 1 2 3 4 5
- With a caesarean section, I can plan when to deliver. 1 2 3 4 5
- With a caesarean section, my baby suffers less. 1 2 3 4 5
- The hospital does not offer epidurals for vaginal delivery. 1 2 3 4 5
- I have already had a caesarean section. 1 2 3 4 5
- After a caesarean it is easier to go back to a couple's life. 1 2 3 4 5
- A friend of mine has already had a caesarean section. 1 2 3 4 5
- A caesarean section is safer for my health. 1 2 3 4 5

### 3. Why would you prefer vaginal delivery?

- Because it does not leave any scar. 1 2 3 4 5
- I don't want to miss the first hour of life of my baby. 1 2 3 4 5
- The postpartum period is less painful. 1 2 3 4 5
- I am afraid of pain but if other women have gone through it, I can also handle it. 1 2 3 4 5
- I don't want my baby to be born through a surgical procedure. 1 2 3 4 5
- It will be easier for me to breastfeed. 1 2 3 4 5
- My husband/partner can be present at the delivery. 1 2 3 4 5

- I want to have many children and I know that with caesareans, the number is limited. 1 2 3 4 5
- The post-partum recovery is faster. 1 2 3 4 5
- The length of hospital stay is shorter. 1 2 3 4 5

**4. How did you obtain the information about delivery that helped you to decide on your preference? (tick the boxes that apply)**

- |                              |                          |                      |                          |
|------------------------------|--------------------------|----------------------|--------------------------|
| • My obstetrician or midwife | <input type="checkbox"/> | The internet         | <input type="checkbox"/> |
| • My husband/partner         | <input type="checkbox"/> | Television           | <input type="checkbox"/> |
| • A parent                   | <input type="checkbox"/> | Through a course     | <input type="checkbox"/> |
| • A friend                   | <input type="checkbox"/> | Newspapers/magazines | <input type="checkbox"/> |

**Socio-economic characteristics:**

- Age :
- Education:
- Have you ever had a baby?
- Have you ever had a caesarean delivery?
